# Supplementary material for: Time-Dependent Degradation of Naphthoquinones and Phenolic Compounds in Walnut Husks
Source: MDPI journal article supplement (doi:10.3390/biology11020342), 2022-02-21
Supplement: s1 [file s1]

**Table S1.** Time-course data for the 26 phenolic compounds and the total phenolic groups contents from the husks of *J. regia*.

| Compound                               | Contents (g/kg FW) according to oxidation time (min) |                    |                    |                    |                     |                    |                    |
|----------------------------------------|------------------------------------------------------|--------------------|--------------------|--------------------|---------------------|--------------------|--------------------|
|                                        | 0                                                    | 20                 | 40                 | 60                 | 180                 | 360                | 540                |
| <b>Naphthoquinones</b>                 |                                                      |                    |                    |                    |                     |                    |                    |
| $\alpha$ -Hydrojuglone                 | 0.15 $\pm$ 0.01 cd                                   | 0.18 $\pm$ 0.01 e  | 0.16 $\pm$ 0.00 de | 0.13 $\pm$ 0.00 c  | 0.05 $\pm$ 0.00 b   | 0.02 $\pm$ 0.00 a  | 0.02 $\pm$ 0.00 a  |
| Juglone (5-hydroxy-1,4-naphthoquinone) | 0.72 $\pm$ 0.10 ac                                   | 0.71 $\pm$ 0.08 ac | 1.05 $\pm$ 0.10 c  | 0.87 $\pm$ 0.06 bc | 0.57 $\pm$ 0.06 ab  | 0.46 $\pm$ 0.08 a  | 0.43 $\pm$ 0.02 a  |
| Hydrojuglone glucoside                 | 15.77 $\pm$ 0.45 d                                   | 9.40 $\pm$ 0.29 c  | 9.58 $\pm$ 0.07 c  | 8.68 $\pm$ 0.03 c  | 2.55 $\pm$ 0.03 b   | 1.45 $\pm$ 0.09 a  | 1.36 $\pm$ 0.06 a  |
| Hydrojuglone rhamnoside                | 3.09 $\pm$ 0.08 bc                                   | 2.73 $\pm$ 0.11 b  | 3.41 $\pm$ 0.14 c  | 3.14 $\pm$ 0.07 bc | 2.62 $\pm$ 0.15 b   | 1.69 $\pm$ 0.07 a  | 1.57 $\pm$ 0.13 a  |
| Hydrojuglone derivative pentoside 1    | 1.21 $\pm$ 0.11 b                                    | 1.35 $\pm$ 0.12 bc | 1.84 $\pm$ 0.19 c  | 1.79 $\pm$ 0.03 c  | 1.11 $\pm$ 0.16 b   | 0.48 $\pm$ 0.03 a  | 0.40 $\pm$ 0.04 a  |
| Hydrojuglone derivative pentoside 2    | 1.12 $\pm$ 0.07 ac                                   | 1.36 $\pm$ 0.12 cd | 1.76 $\pm$ 0.06 e  | 1.50 $\pm$ 0.04 de | 1.21 $\pm$ 0.07 bcd | 0.88 $\pm$ 0.08 ab | 0.79 $\pm$ 0.07 a  |
| Hydrojuglone derivative pentoside 3    | 1.69 $\pm$ 0.08 bc                                   | 1.80 $\pm$ 0.07 bc | 2.30 $\pm$ 0.12 d  | 2.05 $\pm$ 0.08 cd | 1.58 $\pm$ 0.12 b   | 1.03 $\pm$ 0.07 a  | 0.86 $\pm$ 0.10 a  |
| Dihydroxytetralone hexoside            | 2.04 $\pm$ 0.11 d                                    | 1.13 $\pm$ 0.04 c  | 1.26 $\pm$ 0.08 c  | 1.14 $\pm$ 0.01 c  | 0.65 $\pm$ 0.08 b   | 0.24 $\pm$ 0.05 a  | 0.11 $\pm$ 0.01 a  |
| Trihydroxytetralone derivative         | 6.26 $\pm$ 0.11 cd                                   | 7.12 $\pm$ 0.22 e  | 8.75 $\pm$ 0.21 f  | 6.89 $\pm$ 0.15 de | 5.47 $\pm$ 0.16 bc  | 5.00 $\pm$ 0.22 ab | 4.42 $\pm$ 0.17 a  |
| Trihydroxytetralone galloyl hexoside   | 1.37 $\pm$ 0.04 b                                    | 1.25 $\pm$ 0.07 b  | 1.54 $\pm$ 0.11 b  | 1.56 $\pm$ 0.09 b  | 1.32 $\pm$ 0.13 b   | 0.60 $\pm$ 0.04 a  | 0.58 $\pm$ 0.04 a  |
| Juglanin B                             | 0.55 $\pm$ 0.09 a                                    | 0.88 $\pm$ 0.08 bc | 0.96 $\pm$ 0.12 c  | 0.91 $\pm$ 0.02 c  | 0.78 $\pm$ 0.06 bc  | 0.52 $\pm$ 0.04 a  | 0.54 $\pm$ 0.08 a  |
| <b>Flavanols</b>                       |                                                      |                    |                    |                    |                     |                    |                    |
| Procyanidin dimer 1                    | 2.03 $\pm$ 0.09 c                                    | 1.89 $\pm$ 0.10 c  | 2.63 $\pm$ 0.17 d  | 2.31 $\pm$ 0.03 cd | 0.96 $\pm$ 0.08 b   | 0.49 $\pm$ 0.09 a  | 0.17 $\pm$ 0.03 a  |
| Procyanidin dimer 2                    | 2.26 $\pm$ 0.07 c                                    | 2.49 $\pm$ 0.08 cd | 3.29 $\pm$ 0.14 e  | 2.79 $\pm$ 0.07 d  | 0.86 $\pm$ 0.12 b   | 0.34 $\pm$ 0.05 a  | 0.10 $\pm$ 0.03 a  |
| Procyanidin dimer 3                    | 1.13 $\pm$ 0.08 c                                    | 1.11 $\pm$ 0.07 c  | 1.38 $\pm$ 0.09 c  | 1.34 $\pm$ 0.02 c  | 0.63 $\pm$ 0.17 b   | 0.13 $\pm$ 0.03 a  | 0.03 $\pm$ 0.01 a  |
| Procyanidin dimer 4                    | 1.40 $\pm$ 0.13 d                                    | 1.05 $\pm$ 0.14 cd | 1.28 $\pm$ 0.12 cd | 1.31 $\pm$ 0.04 cd | 0.90 $\pm$ 0.15 bc  | 0.41 $\pm$ 0.06 ab | 0.21 $\pm$ 0.05 a  |
| (+) Catechin                           | 1.41 $\pm$ 0.05 c                                    | 1.54 $\pm$ 0.07 cd | 1.84 $\pm$ 0.08 d  | 1.72 $\pm$ 0.14 cd | 0.83 $\pm$ 0.10 b   | 0.33 $\pm$ 0.06 a  | 0.14 $\pm$ 0.03 a  |
| (-) Epicatechin                        | 1.45 $\pm$ 0.09 a                                    | 3.01 $\pm$ 0.06 c  | 3.59 $\pm$ 0.10 d  | 3.46 $\pm$ 0.06 d  | 3.09 $\pm$ 0.10 c   | 2.52 $\pm$ 0.10 b  | 2.40 $\pm$ 0.01 b  |
| (epi) Catechin derivative              | 0.59 $\pm$ 0.03 c                                    | 0.47 $\pm$ 0.04 bc | 0.55 $\pm$ 0.04 bc | 0.65 $\pm$ 0.03 c  | 0.39 $\pm$ 0.07 b   | 0.19 $\pm$ 0.04 a  | 0.15 $\pm$ 0.02 a  |
| <b>Flavonols</b>                       |                                                      |                    |                    |                    |                     |                    |                    |
| Quercetin-3-galactoside                | 0.46 $\pm$ 0.03 c                                    | 0.39 $\pm$ 0.02 bc | 0.48 $\pm$ 0.02 c  | 0.46 $\pm$ 0.00 c  | 0.33 $\pm$ 0.02 b   | 0.20 $\pm$ 0.02 a  | 0.16 $\pm$ 0.02 a  |
| Quercetin-3-xyloside                   | 0.46 $\pm$ 0.05 bc                                   | 0.53 $\pm$ 0.02 c  | 0.80 $\pm$ 0.03 d  | 0.71 $\pm$ 0.01 d  | 0.52 $\pm$ 0.04 c   | 0.36 $\pm$ 0.02 ab | 0.31 $\pm$ 0.03 a  |
| Quercetin-3-arabinopyranoside          | 1.41 $\pm$ 0.06 c                                    | 1.30 $\pm$ 0.05 c  | 1.68 $\pm$ 0.07 d  | 1.42 $\pm$ 0.03 c  | 0.96 $\pm$ 0.07 b   | 0.59 $\pm$ 0.03 a  | 0.50 $\pm$ 0.02 a  |
| Quercetin-3-arabinofuranoside          | 0.27 $\pm$ 0.02 ac                                   | 0.27 $\pm$ 0.01 ac | 0.33 $\pm$ 0.01 c  | 0.32 $\pm$ 0.01 bc | 0.30 $\pm$ 0.01 bc  | 0.26 $\pm$ 0.02 ab | 0.22 $\pm$ 0.01 a  |
| Quercetin-3-rhamnoside                 | 0.16 $\pm$ 0.02 a                                    | 0.24 $\pm$ 0.02 ab | 0.28 $\pm$ 0.02 b  | 0.22 $\pm$ 0.01 ab | 0.28 $\pm$ 0.01 b   | 0.23 $\pm$ 0.02 ab | 0.21 $\pm$ 0.02 ab |

**Hydroxycinnamic acids**

|                                             |                |                |               |               |               |               |               |
|---------------------------------------------|----------------|----------------|---------------|---------------|---------------|---------------|---------------|
| Neochlorogenic acid (3-caffeoylquinic acid) | 0.49 ± 0.01 ef | 0.44 ± 0.02 de | 0.52 ± 0.01 f | 0.42 ± 0.01 d | 0.26 ± 0.01 c | 0.17 ± 0.01 b | 0.10 ± 0.01 a |
| 3- <i>p</i> -Coumaroylquinic acid           | 1.66 ± 0.03 d  | 1.69 ± 0.03 d  | 2.16 ± 0.04 e | 1.81 ± 0.03 d | 0.91 ± 0.06 c | 0.53 ± 0.03 b | 0.33 ± 0.01 a |

**Hydroxybenzoic acids**

|                                          |                        |                       |                       |                       |                       |                       |                       |
|------------------------------------------|------------------------|-----------------------|-----------------------|-----------------------|-----------------------|-----------------------|-----------------------|
| Gallic acid derivative                   | 0.34 ± 0.03 ab         | 0.33 ± 0.03 ab        | 0.47 ± 0.04 bc        | 0.49 ± 0.01 c         | 0.41 ± 0.05 bc        | 0.23 ± 0.01 a         | 0.22 ± 0.01 a         |
| Total naphthoquinones                    | 35.66 ± 0.49 d         | 29.42 ± 0.55 c        | 33.69 ± 0.66 d        | 29.60 ± 0.38 c        | 18.57 ± 0.64 b        | 12.95 ± 0.61 a        | 11.80 ± 0.46 a        |
| Total flavanols                          | 10.26 ± 0.51 c         | 11.56 ± 0.47 cd       | 14.56 ± 0.69 e        | 13.58 ± 0.35 de       | 7.66 ± 0.73 b         | 4.41 ± 0.35 a         | 3.21 ± 0.16 a         |
| Total flavonols                          | 2.75 ± 0.17 bc         | 2.73 ± 0.11 bc        | 3.57 ± 0.12 d         | 3.12 ± 0.03 cd        | 2.39 ± 0.13 b         | 1.64 ± 0.10 a         | 1.40 ± 0.10 a         |
| Total hydroxycinnamic acids              | 2.15 ± 0.04 d          | 2.13 ± 0.04 d         | 2.68 ± 0.05 e         | 2.24 ± 0.04 d         | 1.17 ± 0.07 c         | 0.70 ± 0.05 b         | 0.42 ± 0.01 a         |
| <b>Total analyzed phenolic compounds</b> | <b>50.74 ± 1.16 cd</b> | <b>45.65 ± 0.80 c</b> | <b>54.08 ± 1.44 d</b> | <b>48.35 ± 0.76 c</b> | <b>29.90 ± 1.57 b</b> | <b>19.61 ± 1.10 a</b> | <b>16.54 ± 0.75 a</b> |

Data are means ± standard error; Data with different letters within the same row (i.e., sampling time) are significantly different (P < 0.05)
